# Supplementary material for: Synthesis of a series of benzothiazole amide derivatives and their biological evaluation as potent hemostatic agents
Source: Royal Society of Chemistry journal article supplement (doi:10.1039/c7ra13397a), 2018-01-01
Supplement: c7ra13397a1.pdf [file c7ra13397a1.pdf]

## Supporting Information

### Synthesis of a Series of Benzothiazole Amide Derivatives and Their Biological Evaluation as Potent Hemostatic Agents

#### 1. Crystal structure description

Selected bond lengths (Å) and angles (°) of compounds **Q7** and **Q9** are listed in Table 1.

**Table 1** Selected bond lengths and angles for compounds **Q7** and **Q9**.

| Compound <b>Q7</b> |                                  |                 |                                  |                 |                                  |                |                                  |
|--------------------|----------------------------------|-----------------|----------------------------------|-----------------|----------------------------------|----------------|----------------------------------|
| Bond               | Bond length (Å)<br>(and angle °) | Bond            | Bond length (Å)<br>(and angle °) | Bond            | Bond length (Å)<br>(and angle °) | Bond           | Bond length (Å)<br>(and angle °) |
| S(1)-C(12)         | 1.7400 (19)                      | O(3)-C(9)       | 1.225 (2)                        | O(2)-C(18)      | 1.430 (2)                        | N(2)-C(11)     | 1.392 (2)                        |
| S(1)-C(12)         | 1.7522 (18)                      | N(1)-C(9)       | 1.376 (2)                        | O(1)-C(3)       | 1.363 (2)                        | N(2)-C(10)     | 1.304 (2)                        |
| O(2)-C(4)          | 1.373 (2)                        | N(1)-C(10)      | 1.373 (2)                        | O(1)-C(17)      | 1.427 (2)                        |                |                                  |
| O(3)-C(9)-C(8)     | 123.92 (17)                      | C(4)-O(2)-C(18) | 117.21 (15)                      | N(1)-C(9)-C(8)  | 115.29 (16)                      | O(1)-C(3)-C(4) | 114.95 (16)                      |
| C(3)-O(1)-C(17)    | 116.60 (15)                      | O(1)-C(3)-C(2)  | 125.29 (17)                      | C(10)-N(1)-C(9) | 123.50 (15)                      | O(3)-C(9)-N(1) | 120.79 (17)                      |
| N(1)-C(10)-S(1)    | 122.04 (13)                      | N(2)-C(10)-N(1) | 121.34 (16)                      |                 |                                  |                |                                  |

  

| Compound <b>Q9</b> |                                  |                |                                  |                |                                  |                |                                  |
|--------------------|----------------------------------|----------------|----------------------------------|----------------|----------------------------------|----------------|----------------------------------|
| Bond               | Bond length (Å)<br>(and angle °) | Bond           | Bond length (Å)<br>(and angle °) | Bond           | Bond length (Å)<br>(and angle °) | Bond           | Bond length (Å)<br>(and angle °) |
| S001-C009          | 1.7412 (17)                      | S001-C00F      | 1.7415 (16)                      | S002-C7        | 1.7510 (16)                      | S002-C1        | 1.7437 (17)                      |
| O003-C00A          | 1.217 (2)                        | O1-C8          | 1.219 (2)                        | N2-C7          | 1.379 (2)                        | N2-C8          | 1.375 (2)                        |
| N006-C00A          | 1.372 (2)                        | N006-C00F      | 1.379 (2)                        | N1-C6          | 1.393 (2)                        | N1-C7          | 1.297 (2)                        |
| N008-C00F          | 1.303 (2)                        | N008-C00R      | 1.394 (2)                        |                |                                  |                |                                  |
| C8-N2-C7           | 123.67 (14)                      | C00A-N006-C00F | 124.81 (14)                      | C7-N1-C6       | 109.56 (14)                      | C00F-N008-C00R | 109.77 (14)                      |
| O003-C00A-N006     | 122.05 (15)                      | O003-C00A-C00O | 124.04 (15)                      | N006-C00A-C00O | 113.87 (14)                      | N2-C7-S002     | 121.74 (12)                      |
| N1-C7-S002         | 117.37 (12)                      | N1-C7-N2       | 120.88 (14)                      | O1-C8-N2       | 121.72 (15)                      |                |                                  |

#### 2. Blood coagulation activities

Using *p*-aminomethylbenzoic acid (PAMBA) as a positive control, the results of APTT, PT and TT assays are listed in Tables 2–4.

**Table 2** R<sub>A</sub>PTT (%) values of the synthesized benzothiazole amide derivatives.

| Compound             | Concentration (μmol/L) |                |                |                |                |
|----------------------|------------------------|----------------|----------------|----------------|----------------|
|                      | 1                      | 5              | 10             | 50             | 100            |
| PAMBA                | -6.37 ± 0.23           | -7.74 ± 0.11   | -7.28 ± 0.30   | -6.83 ± 0.39   | -5.23 ± 0.46   |
| 2-aminobenzothiazole | -4.87±0.13***          | -5.27±0.35***  | -6.19±0.13*    | -4.74±0.23***  | -4.48±0.35***  |
| q1                   | -1.72±0.25***          | -0.54±0.16***  | 0.86±0.25***   | 1.58±0.14***   | 1.87±0.38***   |
| q2                   | -3.97±0.47***          | -3.56±0.24***  | -1.92±0***     | 0.01±0.27***   | 0.82±0.14***   |
| q3                   | -2.19±0.36***          | -1.23±0.27***  | 0.55±0.24***   | 0.96±0.24***   | 3.15±0.14***   |
| q4                   | -3.47±0.12***          | -1.20±0.24***  | -0.96±0.32***  | 0.12±0.24***   | 0.24±0.43***   |
| q5                   | -2.18±0.39***          | -0.26±0.38***  | 2.05±0.44***   | 2.56±0.26***   | 7.57±0.34***   |
| q6                   | -0.96±0.32***          | 0.12±0.11***   | 0.36±0.35***   | 0.60±0.32***   | 0.72±0.21***   |
| q7                   | -0.73±0.15***          | -0.44±0.44***  | 1.91±0.14***   | 2.20±0.25***   | 2.79±0.15***   |
| q8                   | -0.48±0.24***          | -0.84±0.60***  | -1.20±0.43***  | -1.67±0.12***  | -2.75±0.24***  |
| q9                   | 1.03±0.12***           | -0.77±0.26***  | -1.67±0.13***  | -2.31±0.33***  | -2.57±0.22***  |
| Q1                   | 0.14±0.37***           | -8.58±0.37     | -10.10±0.14*** | -6.50±0.14**   | -5.26±0.37     |
| Q2                   | -38.84±0.08***         | -38.26±0***    | -36.12±0.22*** | -36.03±0.43*** | -20.25±0.30*** |
| Q3                   | 0.42±0.38***           | 0.21±0.21***   | -1.98±0.21***  | -0.73±0.21***  | -0.52±0.10***  |
| Q4                   | -35.46±0.17***         | -34.96±0.30*** | -34.22±0.22*** | -31.90±0.41*** | -4.80±0.14     |
| Q5                   | -12.06±0.20***         | -10.03±0.34*** | -9.58±0.11***  | -9.47±0.29***  | -7.89±0.11***  |
| Q6                   | -9.47±0.11***          | -8.90±0.11*    | -8.46±0.41**   | -7.90±0.11**   | -7.33±0.34***  |
| Q7                   | -4.55±0.28***          | -6.21±0.14**   | -8.83±0.14***  | -7.31±0.24**   | -4.41±0.24     |
| Q8                   | 2.24±0.11***           | -0.11±0.11***  | -4.69±0.18***  | -3.52±0.11***  | 0.85±0.11***   |
| Q9                   | -5.75±0.30             | -4.06±0.46***  | -3.95±0.20***  | -1.01±0.30***  | 4.51±0.20***   |

Data represent mean ± SEM; n = 8.

\*  $P < 0.05$  vs. PAMBA ; \*\*  $P < 0.01$  vs. PAMBA; \*\*\*  $P < 0.001$  vs. PAMBA.

**Table 3** R<sub>PT</sub> (%) values of the synthesized benzothiazole amide derivatives.

| Compound             | Concentration (μmol/L) |                |               |               |                |
|----------------------|------------------------|----------------|---------------|---------------|----------------|
|                      | 1                      | 5              | 10            | 50            | 100            |
| PAMBA                | 1.15 ± 0.28            | 1.05 ± 0.18    | 0.73 ± 0.48   | 0.63 ± 0.28   | 0.73 ± 0.18    |
| 2-aminobenzothiazole | -1.05±0.46***          | -1.22±0.30***  | -1.57±0.17*** | -4.36±0***    | -4.48±0.35***  |
| q1                   | 7.60±0.17***           | 4.73±0.45***   | 2.87±0.59**   | -1.35±0.45**  | -2.20±0.29***  |
| q2                   | -4.78±0.27***          | -3.85±0.27***  | -3.70±0.15*** | -3.39±0.27*** | -2.93±0.27***  |
| q3                   | -2.23±0.15***          | -1.92±0.26***  | -0.89±0.39*   | -0.30±0.15    | 0.45±0.14      |
| q4                   | -2.71±0.15***          | -2.56±0.30***  | 0.00±0.15     | 0.30±0.52     | 0.90±0.40      |
| q5                   | -5.94±0.45***          | -2.53±0.39***  | -1.78±0.15**  | -0.45±0.39    | 2.23±0.54*     |
| q6                   | -4.16±0.15***          | -3.23±0.56***  | -2.31±0.41*** | -1.23±0.15*   | -0.15±0.27     |
| q7                   | -0.77±0.41*            | 0.77±0.27      | 1.23±0.27     | 1.69±0.46     | 1.85±0.31      |
| q8                   | 1.52±0.45              | 3.21±0.34**    | 4.39±0.29***  | 5.57±0.45***  | 6.76±0.34***   |
| q9                   | -5.42±0.54***          | -1.51±0.26***  | -1.05±0.45*   | -0.45±0.40    | 1.51±0.15      |
| Q1                   | -2.12±0.28***          | -5.22±0.33***  | -4.73±0.16*** | -3.59±0.57*** | -2.12±0.28***  |
| Q2                   | -6.79±0.15***          | -5.91±0.15***  | -4.43±0.15*** | -1.62±0.26*** | -0.59±0.15**   |
| Q3                   | -6.57±0.13***          | -5.36±0.13***  | -4.29±0.23*** | -1.21±0.13*** | -0.13±0.13     |
| Q4                   | -9.90±0.15***          | -7.24±0.15***  | -5.47±0.30*** | -4.73±0***    | -2.07±0.44***  |
| Q5                   | -11.43±0.13***         | -10.22±0.13*** | -9.67±0***    | -4.03±0.23*** | -2.28±0.13***  |
| Q6                   | -4.57±0.48***          | -4.70±0.13***  | -6.99±0.13*** | -9.54±0.13*** | -14.79±0.13*** |
| Q7                   | -3.57±0.28***          | -4.40±0.16***  | -5.38±0.33*** | -6.85±0.16*** | -7.83±0.33***  |
| Q8                   | -1.61±0.13***          | -4.29±0***     | -3.89±0.23*** | -4.83±0.27*** | -1.21±0.13***  |
| Q9                   | -9.82±0.27***          | -6.72±0.13***  | -5.19±0.13*** | -4.03±0.23*** | -3.90±0.27***  |

Data represent mean ± SEM; n = 8.

\*  $P < 0.05$  vs. PAMBA; \*\*  $P < 0.01$  vs. PAMBA; \*\*\*  $P < 0.001$  vs. PAMBA.

**Table 4** R<sub>TT</sub> (%) values of the synthesized benzothiazole amide derivatives.

| Compound             | Concentration (μmol/L) |                |                |                |                |
|----------------------|------------------------|----------------|----------------|----------------|----------------|
|                      | 1                      | 5              | 10             | 50             | 100            |
| PAMBA                | -7.13 ± 0.63           | -4.99 ± 0.63   | -4.75 ± 0.48   | -4.28 ± 0.36   | -4.04 ± 0.24   |
| 2-aminobenzothiazole | 12.57±0.29***          | 11.40±0***     | 9.36±0.29***   | 3.51±0.31***   | 0.58±0.29***   |
| q1                   | 0.26±0.26***           | -0.52±0.26***  | -1.82±0.26***  | -3.16±0.45     | -5.47±0.45*    |
| q2                   | -2.53±0.51***          | -1.52±0.25***  | 1.01±0.44***   | 2.03±0.25***   | 4.30±0.51***   |
| q3                   | 0.98±0.42***           | -0.98±0.24***  | -4.39±0.24     | -5.61±0.42     | -6.10±0.24**   |
| q4                   | -4.95±0.26*            | -3.91±0        | -2.87±0.26*    | -1.82±0.52*    | -1.56±0.45***  |
| q5                   | -6.58±0.44             | -5.32±0.25     | -0.76±0.51***  | 1.77±0.44***   | 3.54±0.25***   |
| q6                   | -2.29±0.43***          | -1.02±0.51***  | -0.51±0.25***  | 0.51±0.67***   | 2.04±0.25***   |
| q7                   | -4.15±0***             | -1.71±0.24***  | 2.44±0.42***   | 5.12±0.49***   | 8.29±0***      |
| q8                   | -4.30±0.44**           | -2.28±0.25***  | -1.27±0.44***  | 2.03±0.51***   | 3.04±0.25***   |
| q9                   | -4.12±0.45***          | -2.06±0.26***  | -1.55±0.26***  | 0.01±0.52***   | 1.03±0.25***   |
| Q1                   | -7.38±0.22             | -11.50±0.38*** | -12.15±0.38*** | -12.80±0.01*** | -14.53±0.22*** |
| Q2                   | -6.67±0.24             | -11.43±0.41*** | -17.14±0.01*** | -24.52±0.24*** | -16.43±0.41*** |
| Q3                   | -3.11±0.19***          | -4.47±0        | -16.70±0.34    | -14.18±0.19*** | -9.13±0.34***  |
| Q4                   | -21.91±0.28***         | -20.24±0.24*** | -18.10±0.24*** | -15.00±0.41*** | -13.33±0.24*** |
| Q5                   | -10.563±0.10***        | -11.97±0.41*** | -13.62±0.23*** | -20.19±0.23*** | -20.66±0.47*** |
| Q6                   | -14.46±0.24***         | -10.9±0.24***  | -5.21±0.47***  | -4.98±0.47     | -0.95±0.24***  |
| Q7                   | -19.31±0.38***         | -17.57±0.22*** | -17.14±0.22*** | -16.05±0.38*** | -13.23±0.22*** |
| Q8                   | -29.13±0.39***         | -28.35±0.01*** | -27.96±0.19*** | -16.31±0.39*** | -13.20±0.34*** |
| Q9                   | -2.61±0.41***          | -3.79±0.24     | -11.61±0.24*** | -17.54±0.41*** | -18.48±0.24*** |

Data represent mean ± SEM; n = 8.

\*  $P < 0.05$  vs. PAMBA; \*\*  $P < 0.01$  vs. PAMBA; \*\*\*  $P < 0.001$  vs. PAMBA

Compound **Q2** significantly shortened the APTT ( $P < 0.001$ ; Table 2) and exhibited a minimum APTT value ( $R_{APTT} = -38.84 \pm 0.08\%$ ; Table 2), while significantly shortening the TT ( $R_{TT} = -24.52 \pm 0.24\%$ , 50 μmol/L,  $P < 0.001$ ; Table 4) and the PT ( $R_{PT} = -6.79 \pm 0.15\%$ , 1 μmol/L,  $P < 0.001$ ; Table 3). The blood coagulant activities results demonstrated that compound **Q2** showed significantly shortened APTT, PT and TT than the positive control of PAMBA.
